# Supplementary material for: One-dimensional CdS nanowires–CeO2 nanoparticles composites with boosted photocatalytic activity
Source: Royal Society of Chemistry journal article supplement (doi:10.1039/c5nj00976f), 2015-01-01
Supplement: c5nj00976f1.pdf [file c5nj00976f1.pdf]

## ***Electronic Supplementary Information***

### **One-dimensional CdS nanowires-CeO<sub>2</sub> nanoparticles composites with boosted photocatalytic activity**

Xin Zhang,<sup>a</sup> Nan Zhang,<sup>a,b</sup> Yi-Jun Xu,<sup>a,b</sup> and Zi-Rong Tang<sup>a\*</sup>

<sup>a</sup> *College of Chemistry, New Campus, Fuzhou University, Fuzhou, 350108, P. R. China.*

<sup>b</sup> *State Key Laboratory of Photocatalysis on Energy and Environment, College of Chemistry,  
Fuzhou University, Fuzhou, 350002, P. R. China.*

\* To whom correspondence should be addressed.

E-mail: [zrtang@fzu.edu.cn](mailto:zrtang@fzu.edu.cn)

### **Experimental Section**

#### ***Synthesis of CdS nanowires (CdS NWs).***

Uniform CdS NWs were prepared according to a method described earlier.<sup>S1-S2</sup> Briefly, 1.124 g of cadmium diethyldithiocarbamate (Cd(S<sub>2</sub>CNEt<sub>2</sub>)<sub>2</sub>), which was prepared by precipitation from a stoichiometric mixture of sodium diethyldithiocarbamate trihydrate and cadmium chloride in deionized water, was added to a Teflon-lined stainless steel autoclave with a capacity of 50 mL. After that, the autoclave was filled with 40 mL of ethylenediamine to about 80% of the total volume and maintained at 180 °C for 24 h. The resulting composites were separated by centrifugation and washed with absolute ethanol and deionized water to remove residue of organic solvents. After drying at 60 °C for 12 h, the CdS NWs were obtained.

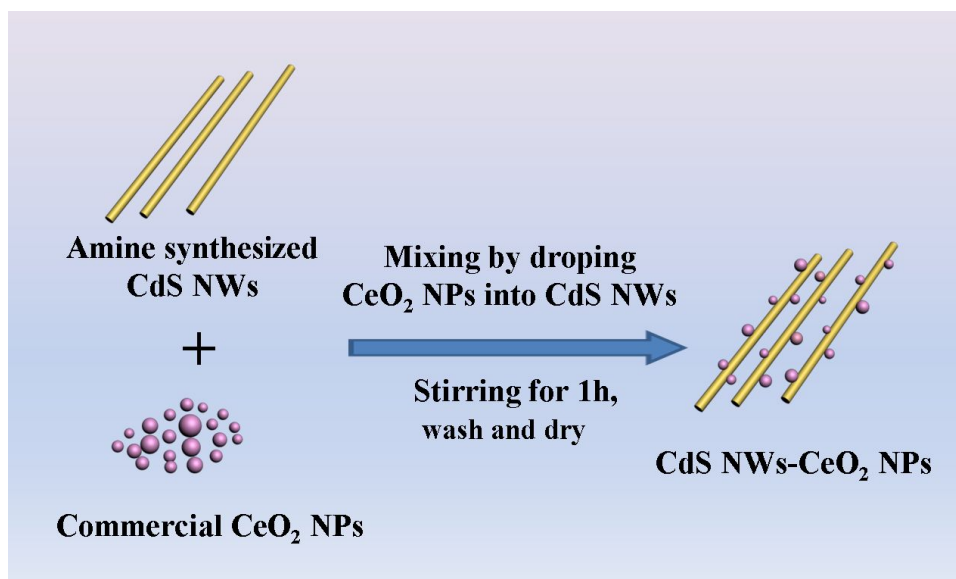

**Scheme S1.** The schematic illustration for synthesis of CdS NWs-CeO<sub>2</sub> NPs composites *via* a facile method at room temperature.

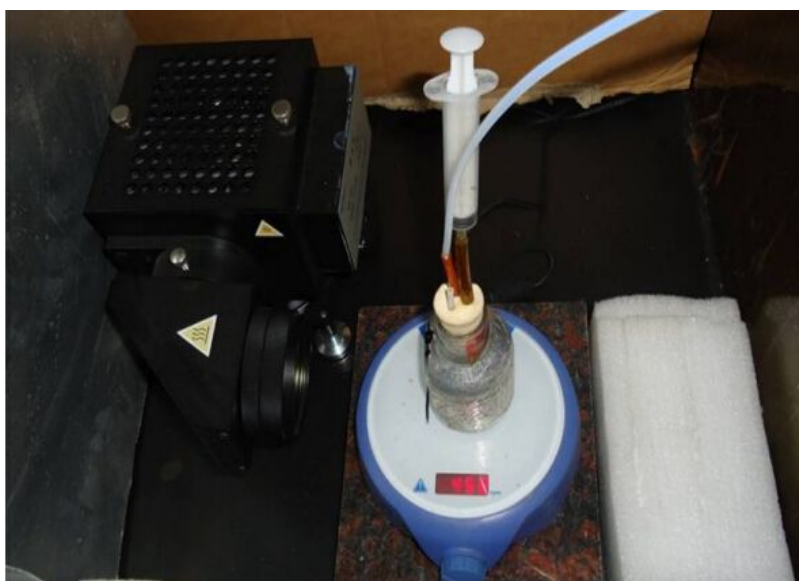

**Fig. S1** Photograph of the experimental setup for photocatalytic reduction of aromatic nitro compounds.

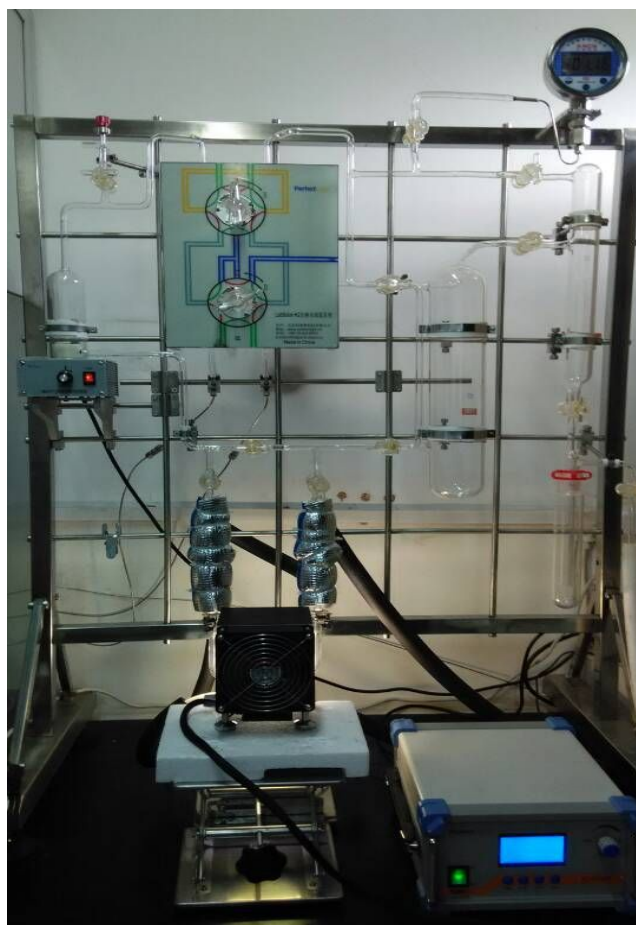

**Fig. S2** Photograph of the experimental setup for photocatalytic water-splitting to hydrogen.

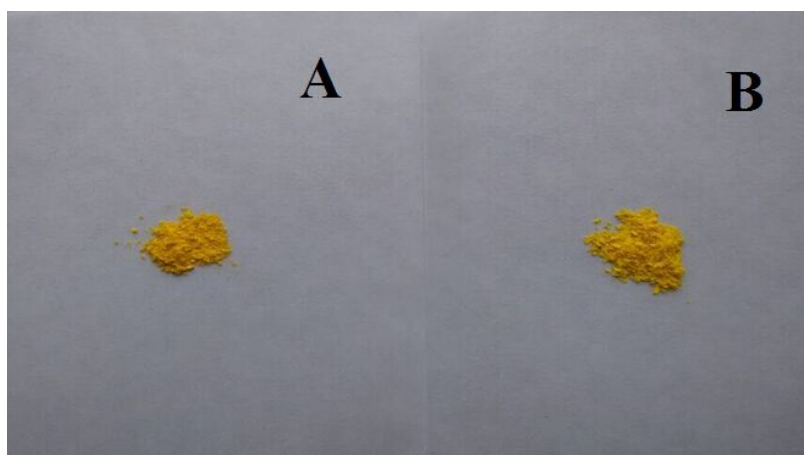

**Fig. S3** Photographs of the samples of CdS NWs (A) and CdS NWs-1% CeO<sub>2</sub> NPs composite (B).

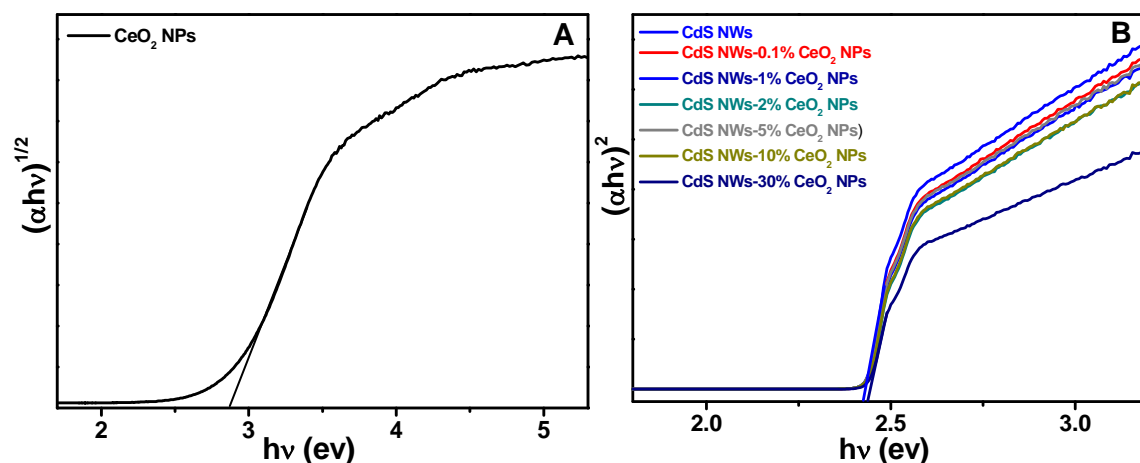

**Fig. S4** The plots of transformed Kubelka-Munk function versus the energy of light for  $\text{CeO}_2$  NPs (A), CdS NWs and CdS NWs- $\text{CeO}_2$  NPs composites (B).

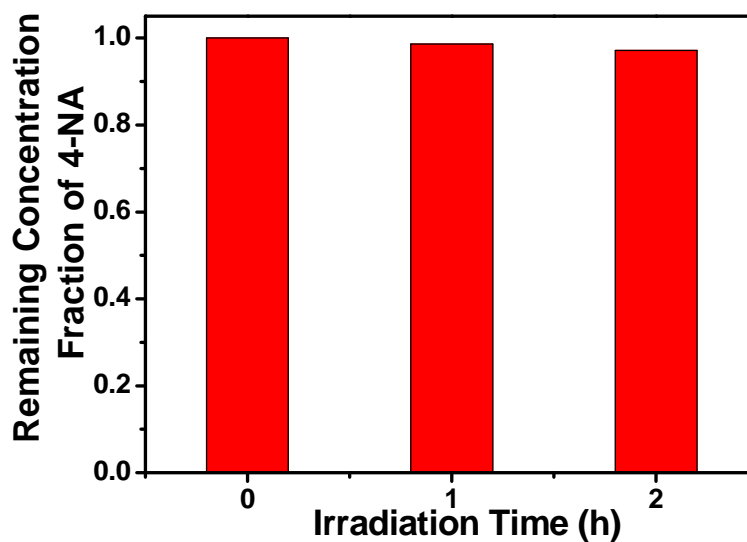

**Fig. S5** Bar plots showing the remaining concentration fraction of 4-nitroaniline (4-NA) after a certain time of visible light irradiation over  $\text{CeO}_2$  NPs.

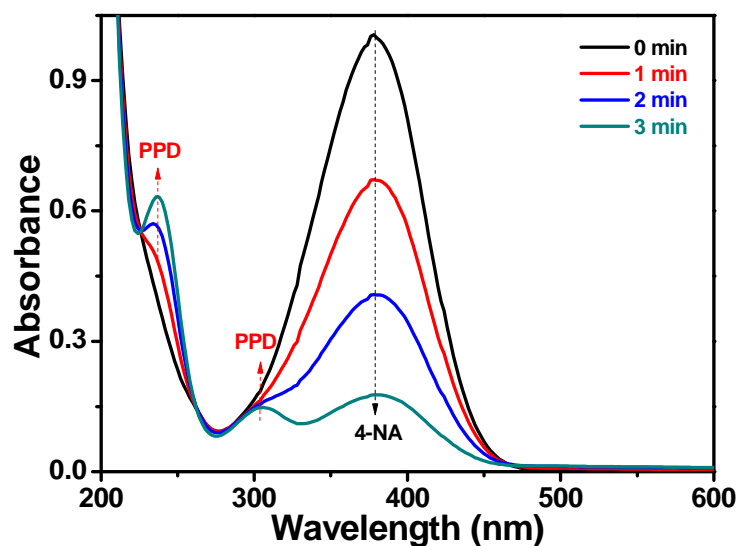

**Fig. S6** Time-dependent UV-vis spectral variation during the photocatalytic reduction of 4-nitroaniline (4-NA) to *p*-phenylenediamine (PPD) over CdS NWs-1%CeO<sub>2</sub> NPs composite under visible light irradiation ( $\lambda > 420$  nm) with the addition of ammonium formate as a quencher for photogenerated holes and N<sub>2</sub> purge at room temperature in the aqueous phase. The peak located at 380 nm is attributed to 4-NA and the peaks at 300 nm and 240 nm are ascribed to PPD.

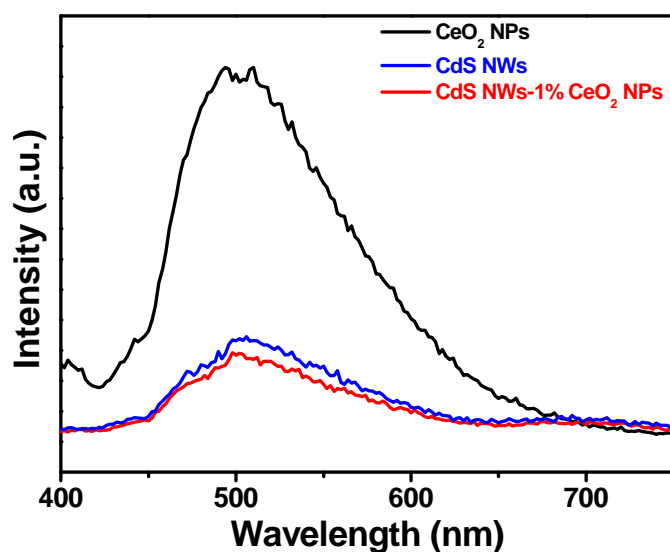

**Fig. S7** Photoluminescence (PL) spectra of CeO<sub>2</sub> NPs, CdS NWs and CdS NWs-1%CeO<sub>2</sub> NPs composite with an excitation wavelength of 380 nm.

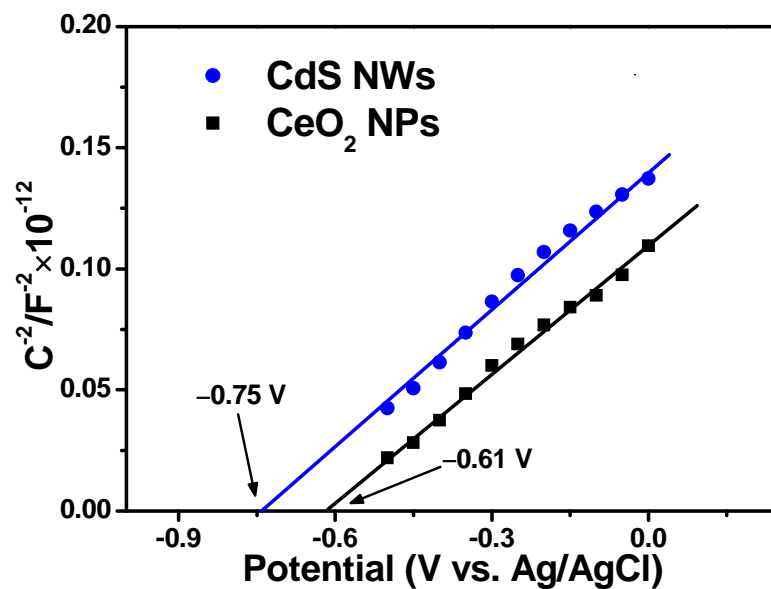

**Fig. S8** Mott-Schottky plots for CeO<sub>2</sub> NPs and CdS NWs in 0.2 M Na<sub>2</sub>SO<sub>4</sub> aqueous solution (pH = 6.8).

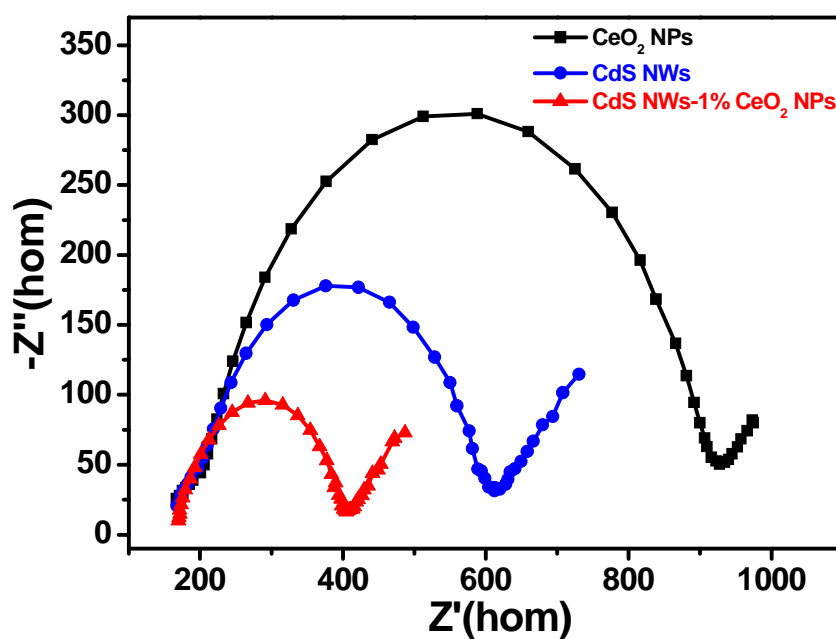

**Fig. S9** Nyquist impedance plots of CeO<sub>2</sub> NPs, CdS NWs and CdS NWs-1% CeO<sub>2</sub> NPs composite under visible light irradiation ( $\lambda > 420$  nm).

**Table S1.** Summary of the Brunauer-Emmett-Teller (BET) surface area and pore volume of CeO<sub>2</sub> NPs, CdS NWs and CdS NWs-1%CeO<sub>2</sub> NPs composite.

| Samples                         | S <sub>BET</sub><br>(m <sup>2</sup> /g) | Total pore volume<br>(cm <sup>3</sup> /g) |
|---------------------------------|-----------------------------------------|-------------------------------------------|
| CeO <sub>2</sub> NPs            | 8.2                                     | 0.02                                      |
| CdS NWs                         | 28.9                                    | 0.15                                      |
| CdS NWs-1% CeO <sub>2</sub> NPs | 24.5                                    | 0.12                                      |

## References

1. J. Cao, J.-Z. Sun, H.-Y. Li, J. Hong and M. Wang, *J. Mater. Chem.*, 2004, **14**, 1203-1206.
2. L. Wang, H. W. Wei, Y. J. Fan, X. Gu and J. H. Zhan, *J. Phys. Chem. C*, 2009, **113**, 14119-14125.
